# Supplementary material
Source: Research Square preprint supplement (doi:10.21203/rs.3.rs-8900217/v1)
Supplement: Supplementary file 1 [file d50e603d6647a76122fe827e.docx]

# Supplementary Material


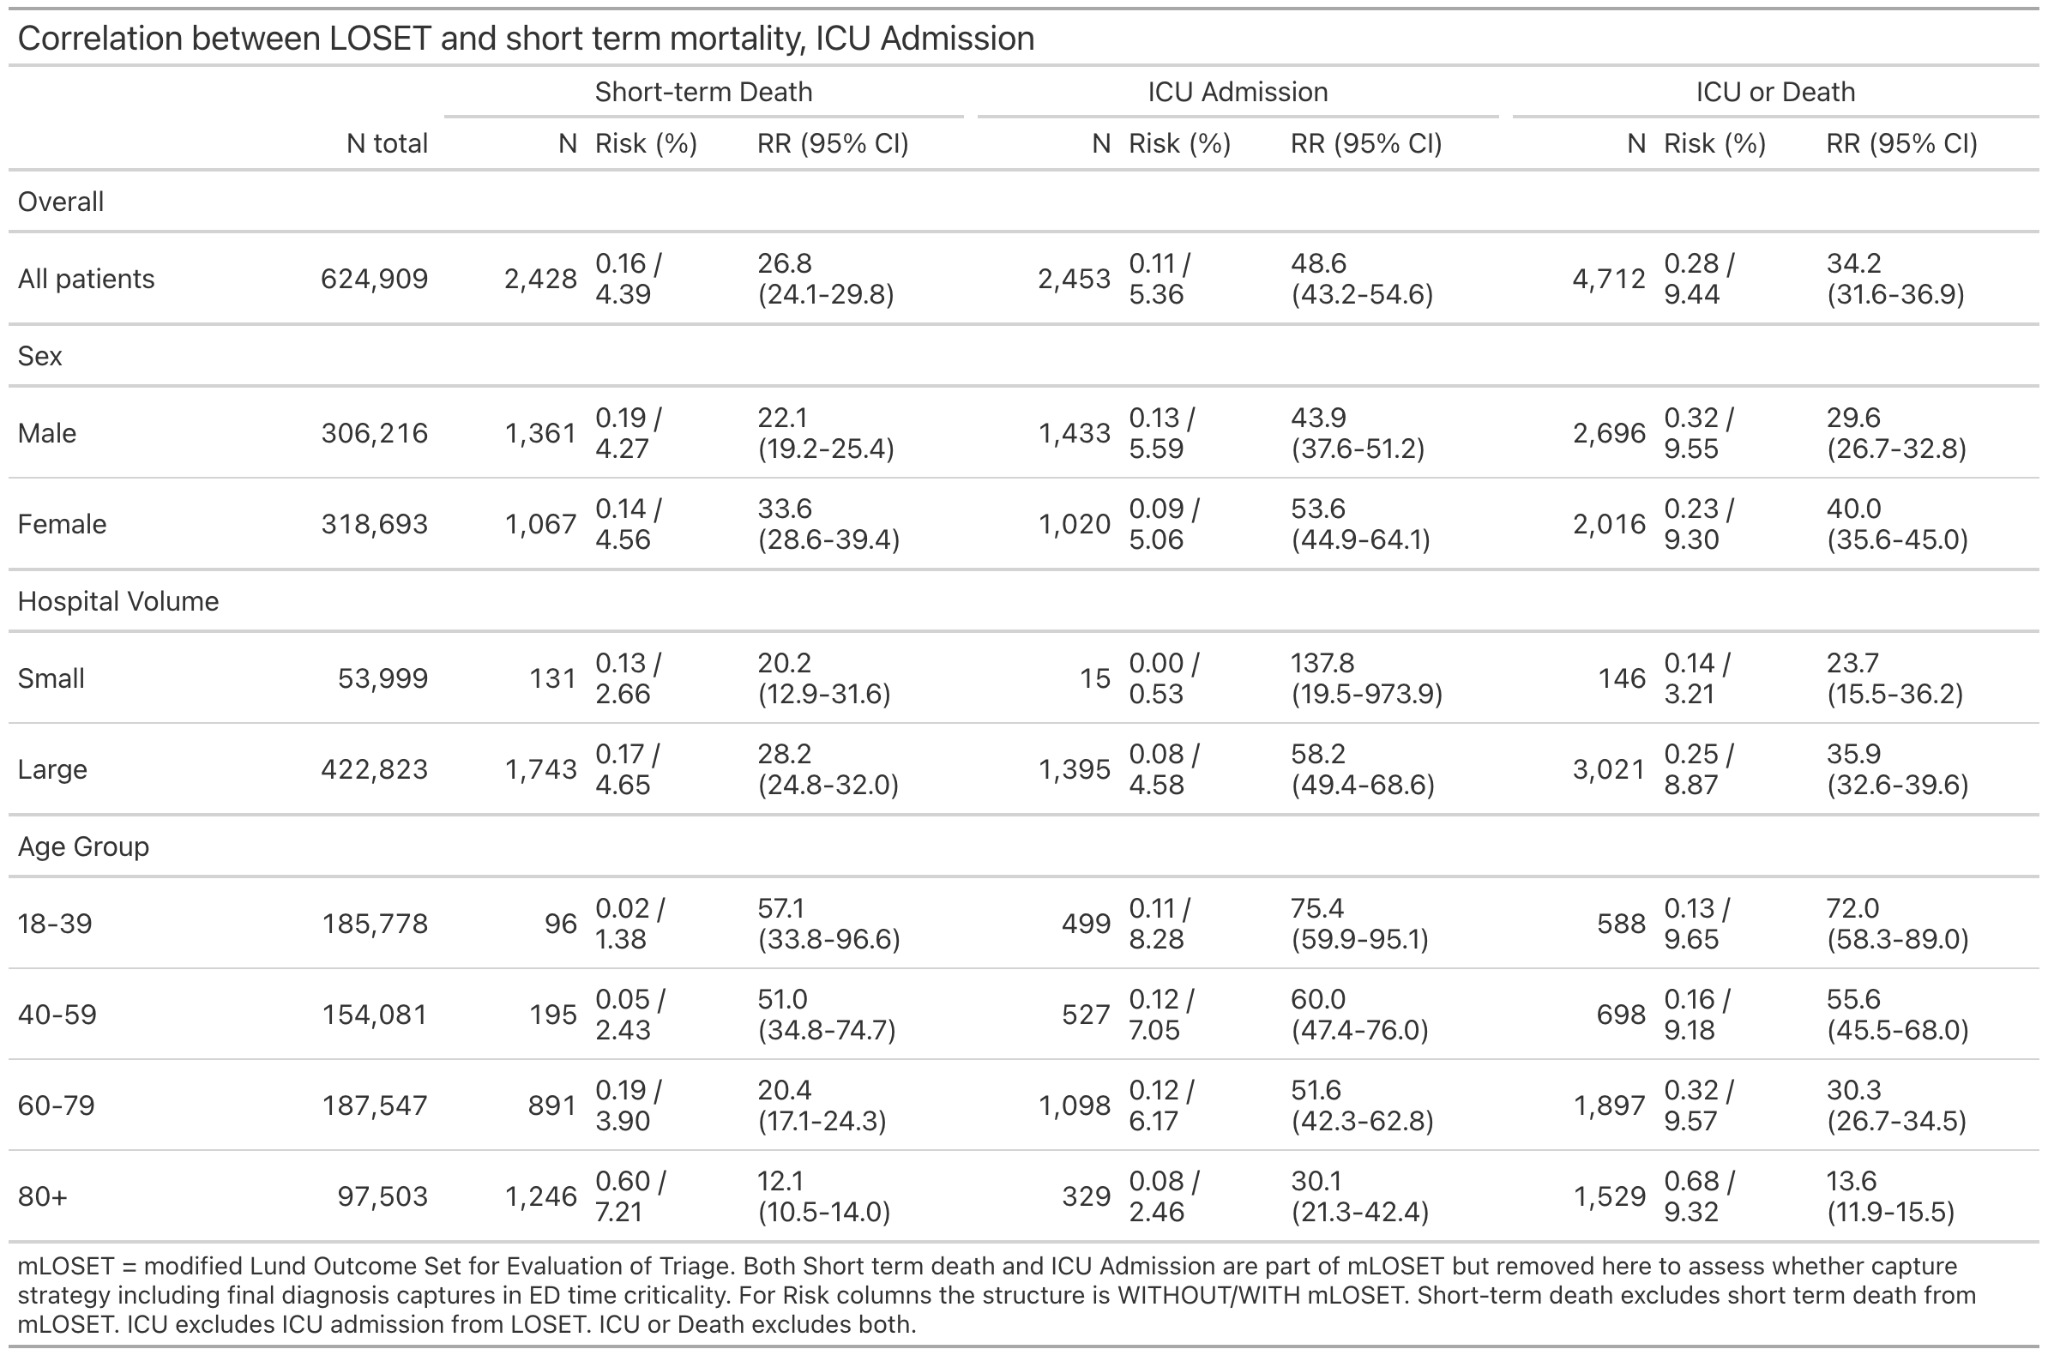


*Supplementary Table 1. Relationship between mLOSET and short term death/ICU admission, stratified by sex, hospital volume and age group.*


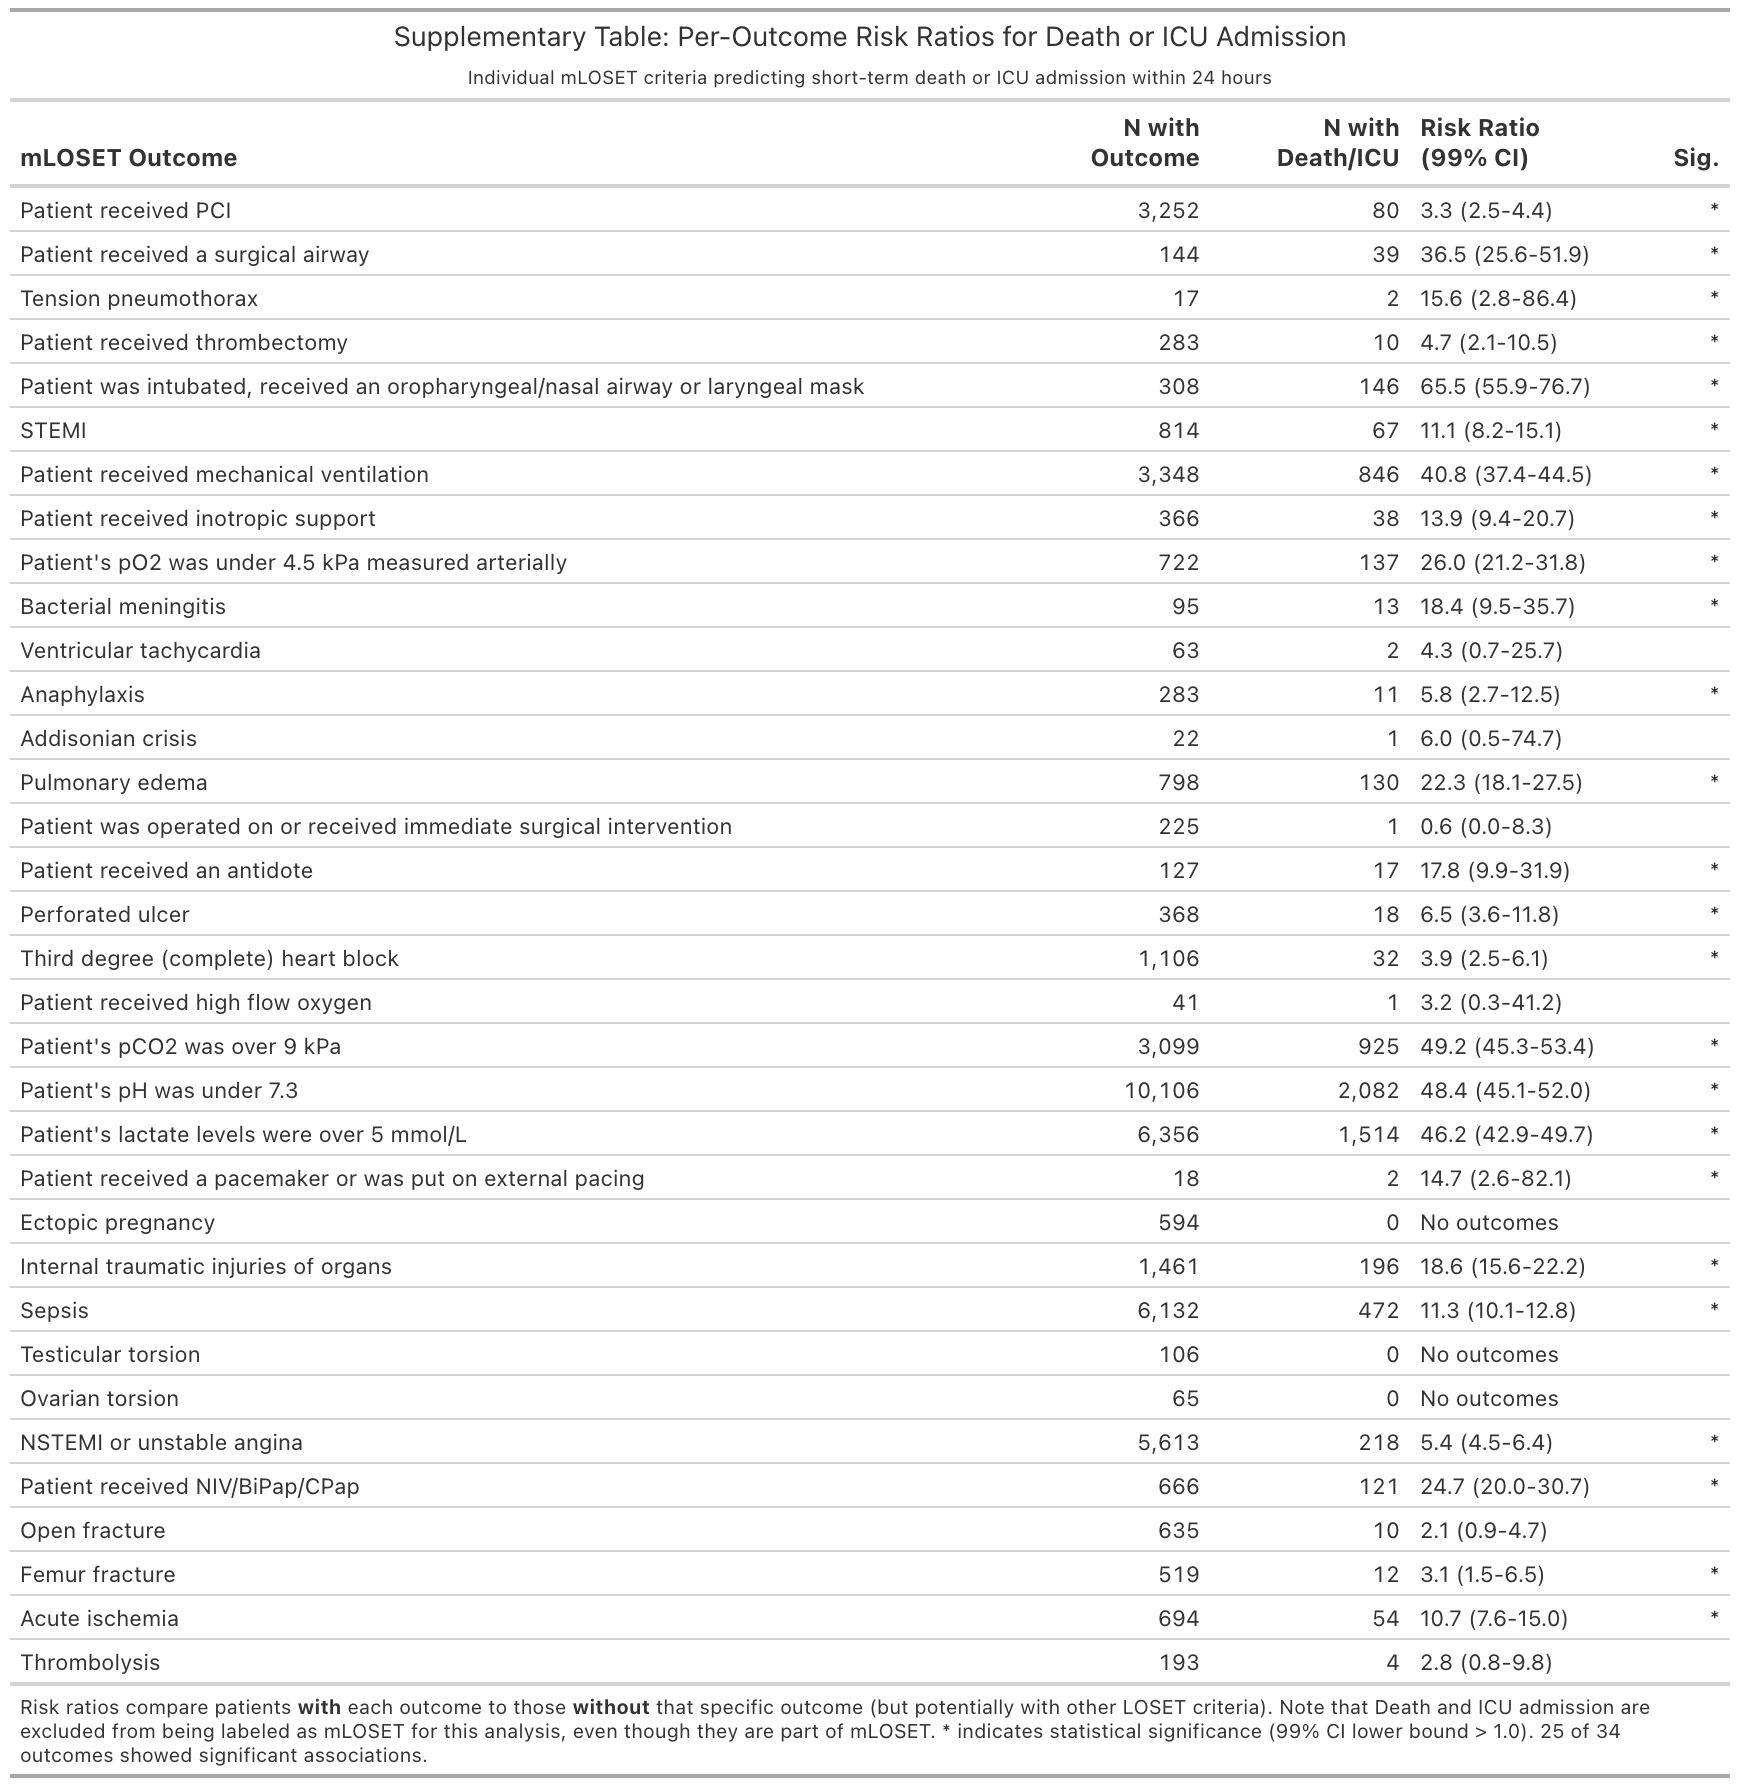


*Supplementary Table 2. Risk Ratio for short term death/ICU admission, per outcome in mLOSET.*


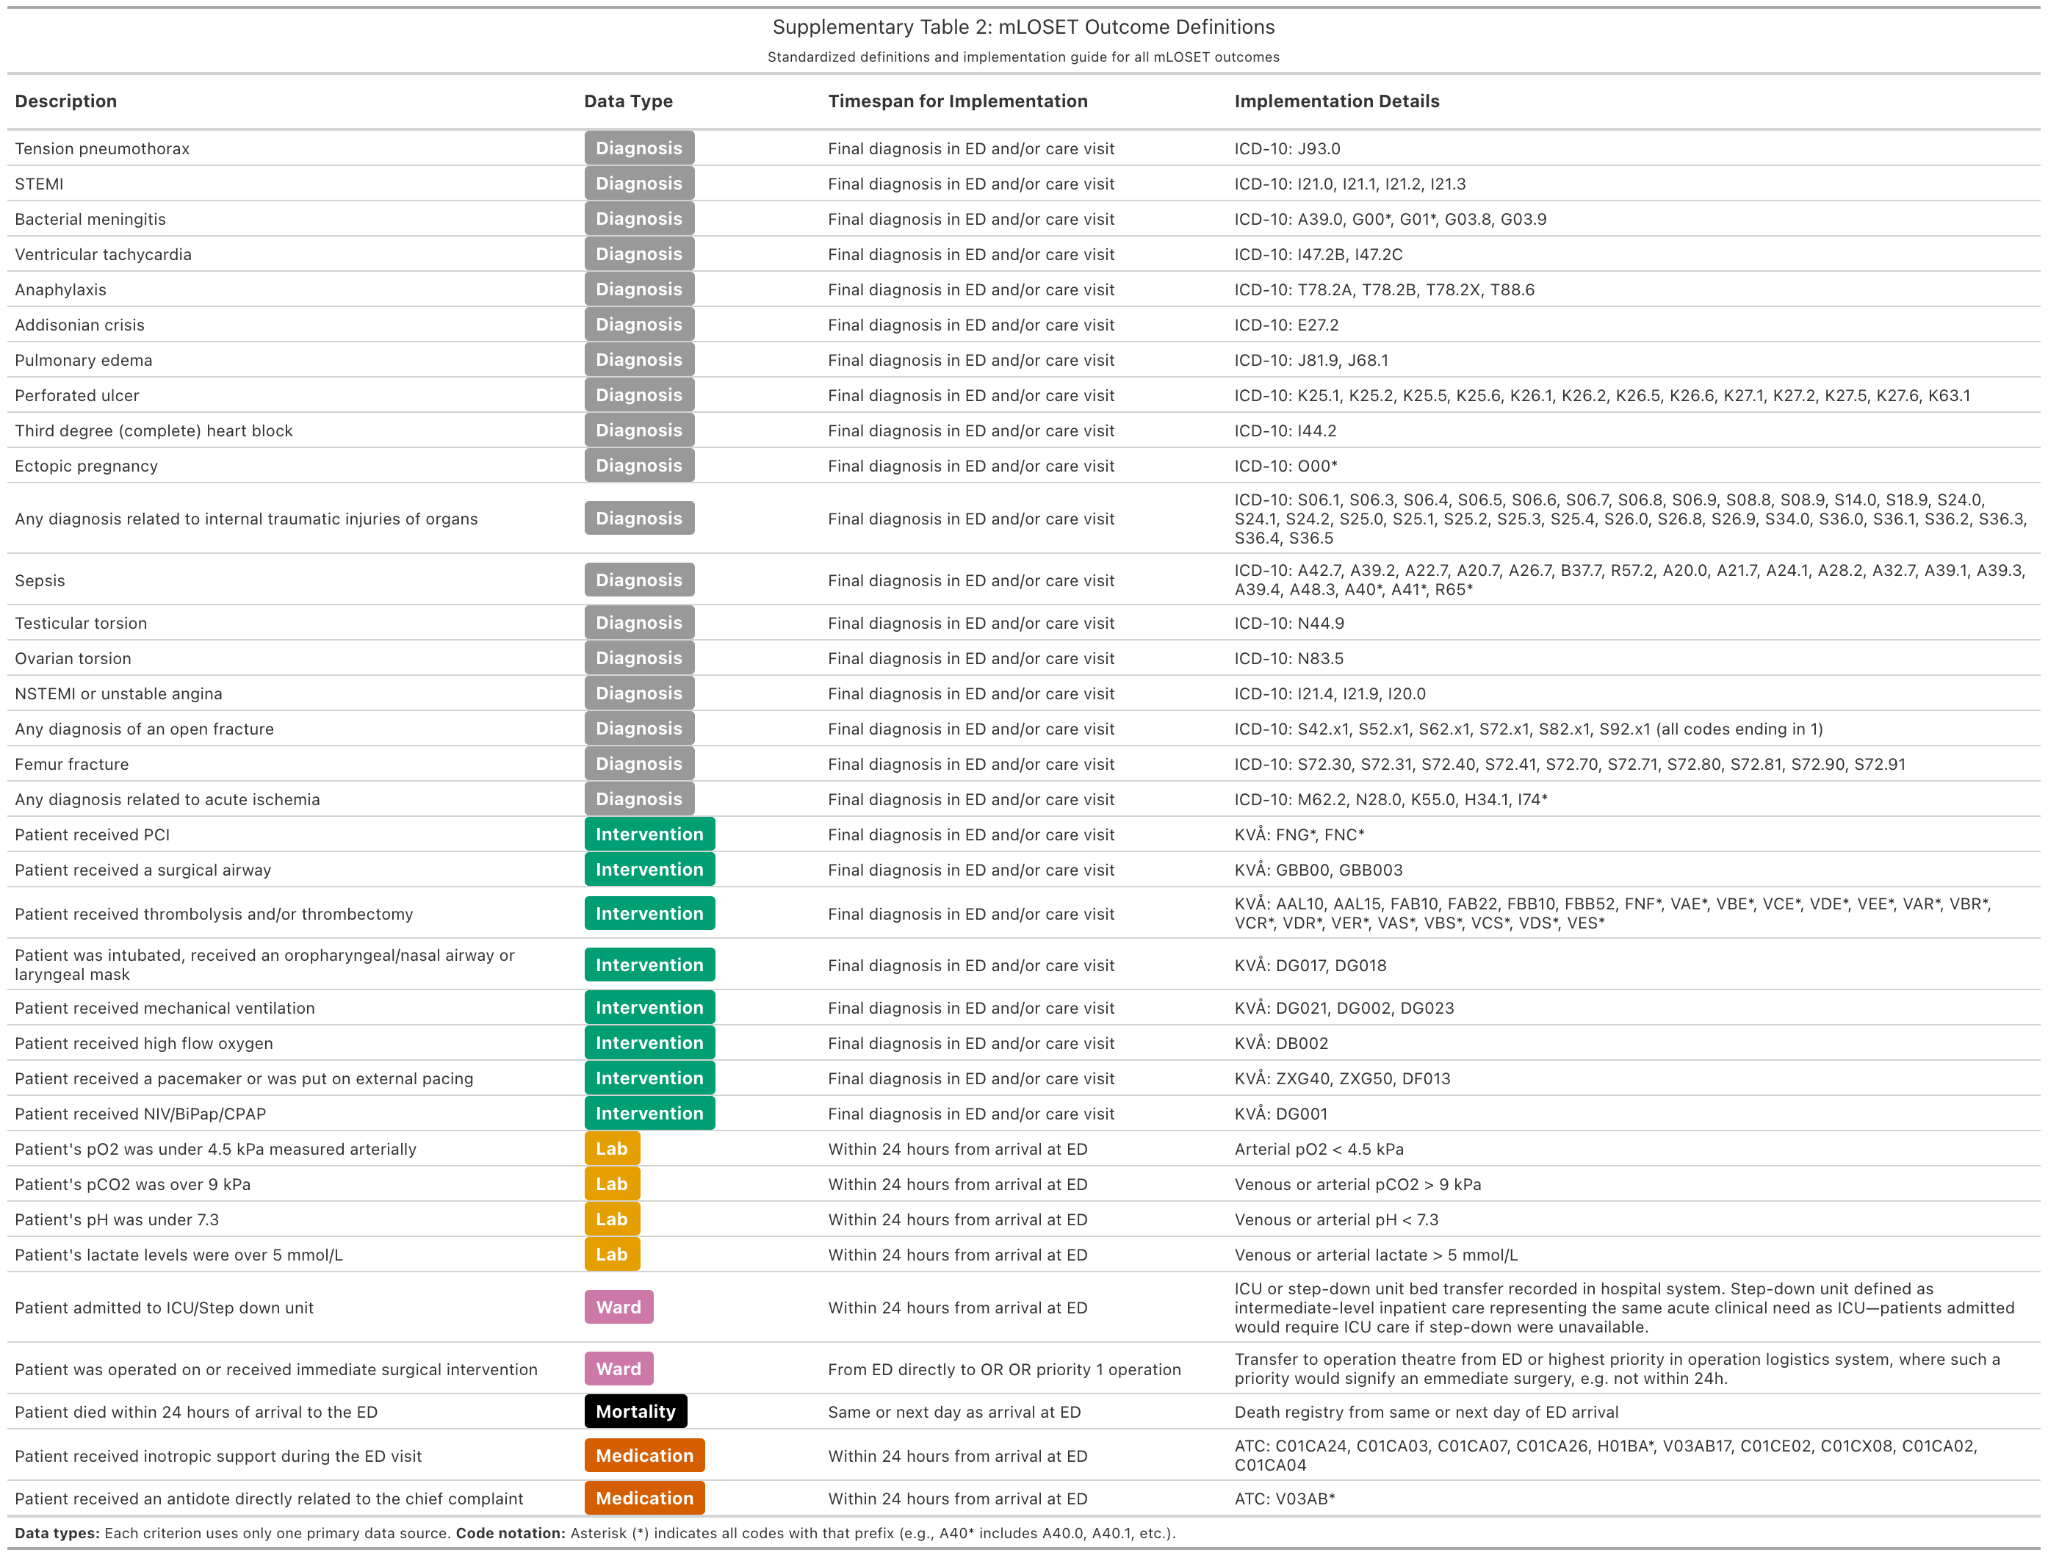


*Supplementary Table 3: Definition of each outcome in mLOSET together with type data type required for implementation.*

*
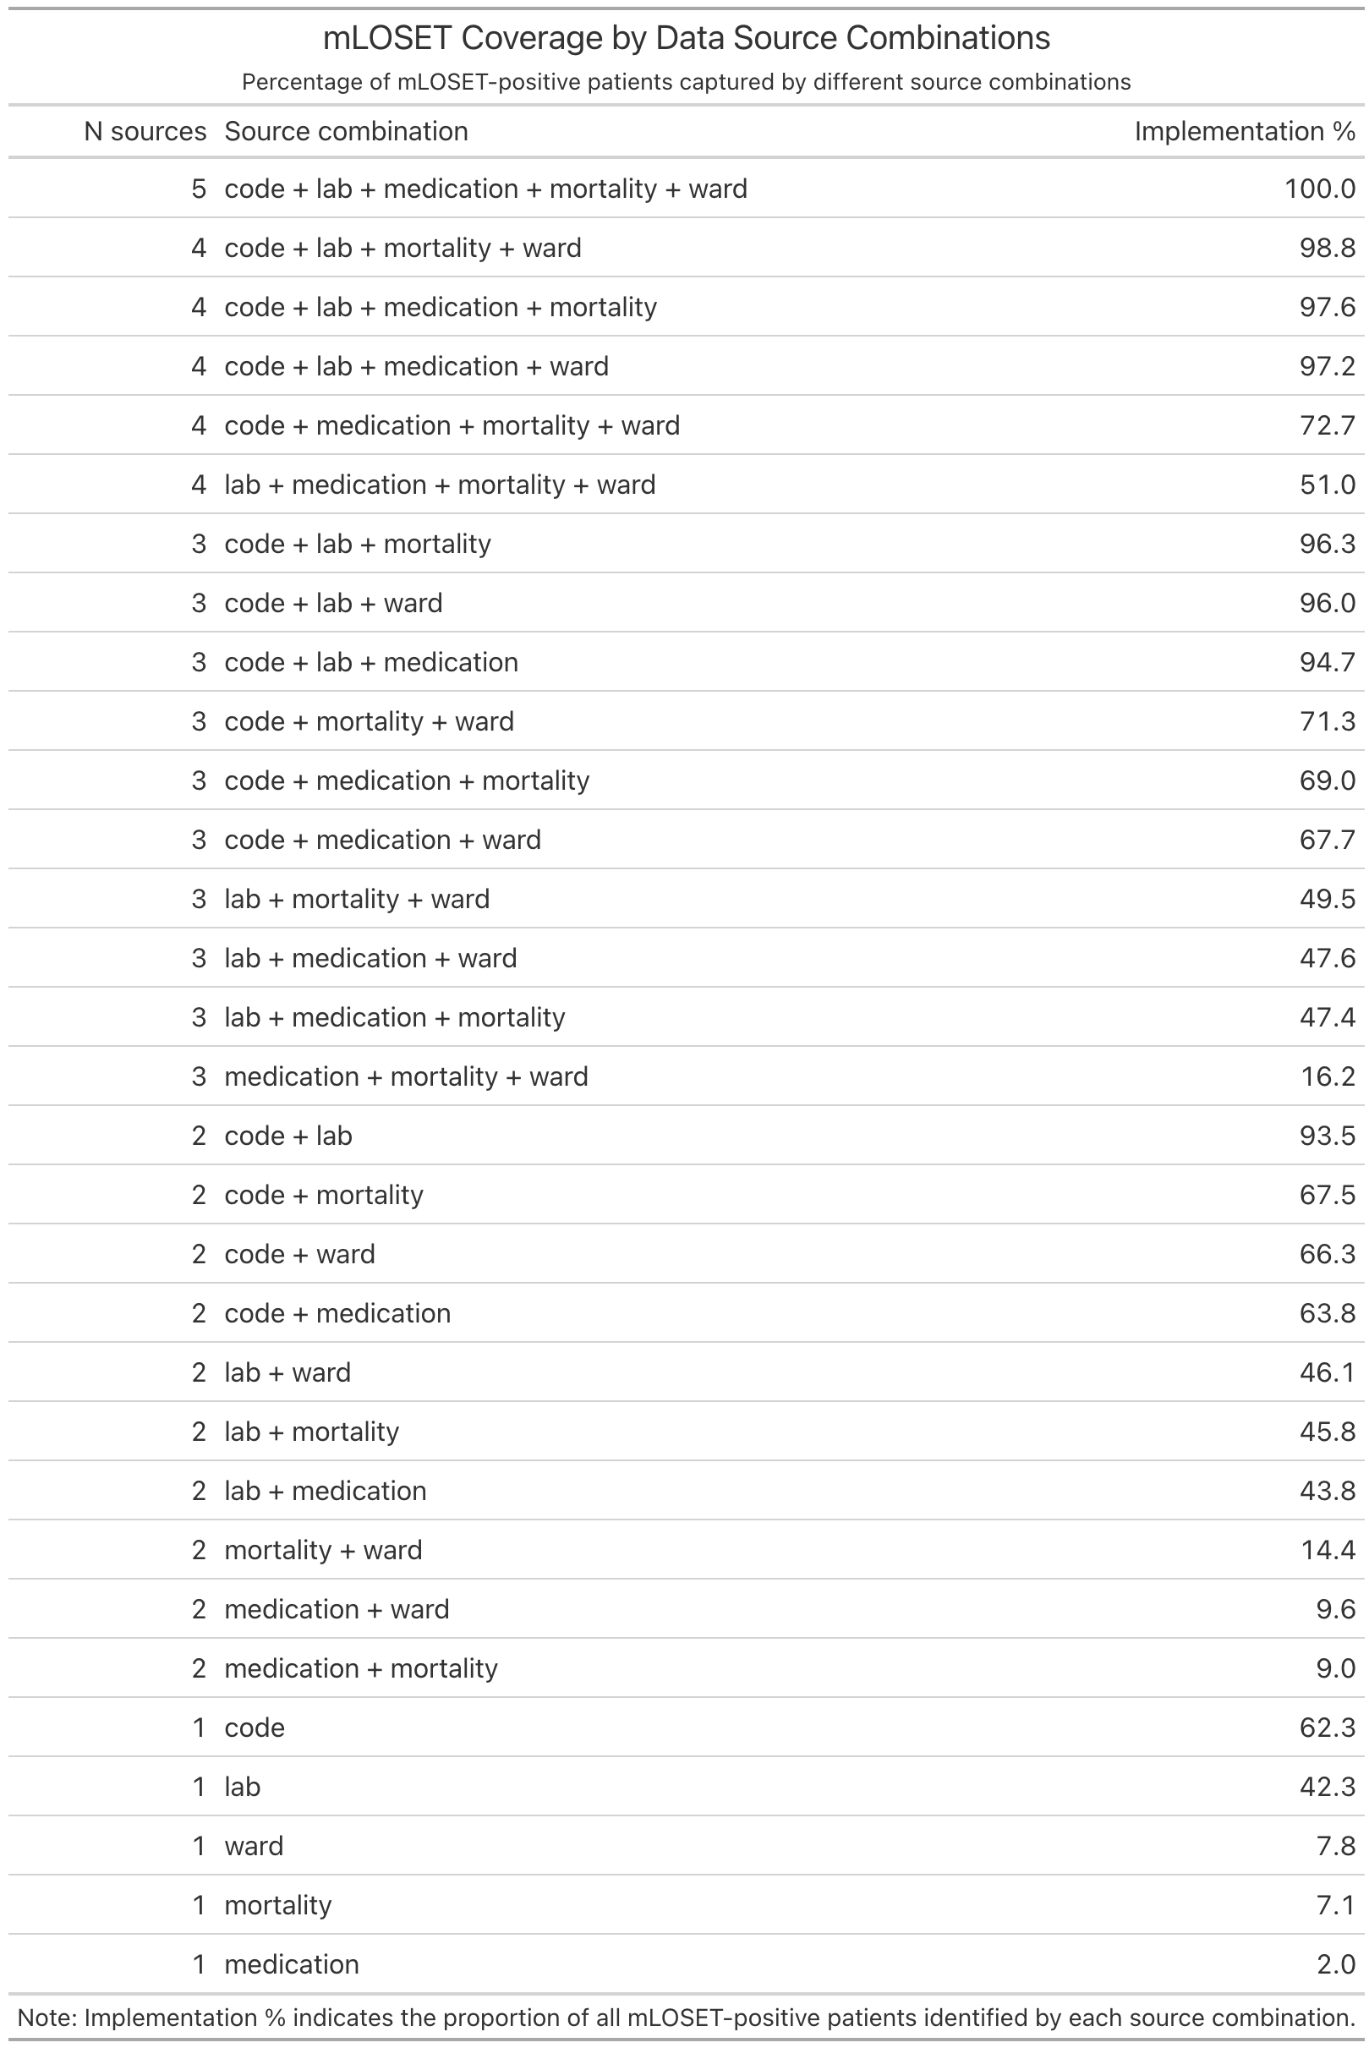
*

*Supplementary Table 4: Percentage of total mLOSET-positive patients identified using different combinations of available data sources.*
